# Supplementary material
Source: publisher figshare collection journal article supplement (https://acs.figshare.com/ndownloader/files/8777800)
Supplement: Supplementary file 1 [file 8777800]

Compound	SMILE	KGA IC50 (nM)	GAB IC50 (nM)	GAC IC50 (nM)	Selectivity Index (GAB/KGA)
2	CC1=CC(/C=C2SC(NC\2=O)=O)=C(C)N1C3=CC=C(Br)C=C3	3097 ¡Ó 715	>100000	5373 ¡Ó 312	>32
3	BrC(C=C1)=CC=C1N2C(C3=CC=CS3)=C(/C=C4SC(NC\4=O)=O)C=C2C5=CC=CS5	754 ¡Ó 166	3778 ¡Ó 841	1275 ¡Ó 258	5
4	BrC(C=C1)=CC=C1N2C(C3=CC=CC=C3)=C(/C=C4SC(NC\4=O)=O)C=C2C5=CC=CC=C5	4896 ¡Ó 354	11753 ¡Ó 225	8762 ¡Ó 1196	2.4
5	CC1=CC(/C=C2SC(NC\2=O)=O)=C(C)N1C3=CC=C(C4=CC=C(/C=C5SC(NC/5=O)=O)C=C4)C=C3	102 ¡Ó 20	1188 ¡Ó 128	381 ¡Ó 38	12
6	O=C(/C(S1)=C/C(C=C2C3=CC=CS3)=C(C4=CC=CS4)N2C5=CC=C(C6=CC=C(/C=C7SC(NC/7=O)=O)C=C6)C=C5)NC1=O	50 ¡Ó 6	102 ¡Ó 22	49 ¡Ó 7	2
7	O=C(/C(S1)=C/C(C=C2C3=CC=CC=C3)=C(C4=CC=CC=C4)N2C5=CC=C(C6=CC=C(/C=C7SC(NC/7=O)=O)C=C6)C=C5)NC1=O	45 ¡Ó 4	261 ¡Ó 38	151 ¡Ó 22	5.8
8	CC1=CC(/C=C2SC(NC\2=O)=O)=C(C)N1C3=CC=C(C4=CC=C(/C=C5SC(NC/5=O)=O)C=C4)C(OC)=C3	243 ¡Ó 29	2142 ¡Ó 318	355 ¡Ó 43	8.8
9	O=C(/C(S1)=C/C(C=C2C3=CC=CS3)=C(C4=CC=CS4)N2C5=CC=C(C6=CC=C(/C=C7SC(NC/7=O)=O)C=C6)C(OC)=C5)NC1=O	35 ¡Ó 13	269 ¡Ó 76	53 ¡Ó 13	7.7
10	O=C(/C(S1)=C/C(C=C2C3=CC=CC=C3)=C(C4=CC=CC=C4)N2C5=CC=C(C6=CC=C(/C=C7SC(NC/7=O)=O)C=C6)C(OC)=C5)NC1=O	48 ¡Ó14	787 ¡Ó 177	148 ¡Ó 9	16
11	CC1=CC(/C=C2SC(NC\2=O)=O)=C(C)N1C3=CC=C(C4=CC(CC)=C(/C=C5SC(NC/5=O)=O)C=C4)C=C3	39 ¡Ó 5	1031 ¡Ó 12	87 ¡Ó 2	26
12	O=C(/C(S1)=C/C(C=C2C3=CC=CS3)=C(C4=CC=CS4)N2C5=CC=C(C6=CC(CC)=C(/C=C7SC(NC/7=O)=O)C=C6)C=C5)NC1=O	54 ¡Ó 13	1716 ¡Ó 385	391 ¡Ó 121	32
13	CCC1=C(/C=C2SC(NC/2=O)=O)C=CC(C(C=C3)=CC=C3N4C(C5=CC=CC=C5)=C(/C=C6SC(NC\6=O)=O)C=C4C7=CC=CC=C7)=C1	56 ¡Ó 7	1244 ¡Ó 65	217 ¡Ó 53	22
14	CC1=CC(/C=C2SC(NC\2=O)=O)=C(C)N1C3=CC=C(C4=CC(CC)=C(/C=C5SC(NC/5=O)=O)C=C4)C(OC)=C3	66 ¡Ó 6	1189 ¡Ó 19	177 ¡Ó 50	18
15	CC1=CC(/C=C2SC(NC\2=O)=O)=C(C)N1C3=CC=C(C4=CC(CC)=C(/C=C5SC(NC/5=O)=O)C=C4)C(C#N)=C3	59 ¡Ó 17	1185 ¡Ó 28	92 ¡Ó 8	20
16	CC1=CC(/C=C2SC(NC\2=O)=O)=C(C)N1C3=CC=C(C4=CC=C(/C=C5SC(NC/5=O)=O)C=C4)C(O)=C3	247 ¡Ó 13	5725 ¡Ó 463	760 ¡Ó 148	23
17	CC1=CC(/C=C2SC(NC\2=O)=O)=C(C)N1C3=CC=C(C4=CC(Cl)=C(/C=C5SC(NC/5=O)=O)C=C4)C=C3	57 ¡Ó 15	4188 ¡Ó 61	255 ¡Ó 29	74
